# Supplementary material
Source: HighWire-hosted journal article supplement (https://www.cmaj.ca/highwire/filestream/73190/field_highwire_adjunct_files/0/181519-res-1-at.pdf)

**Appendix 1 (as supplied by the authors):** Criteria for study inclusion and exclusion

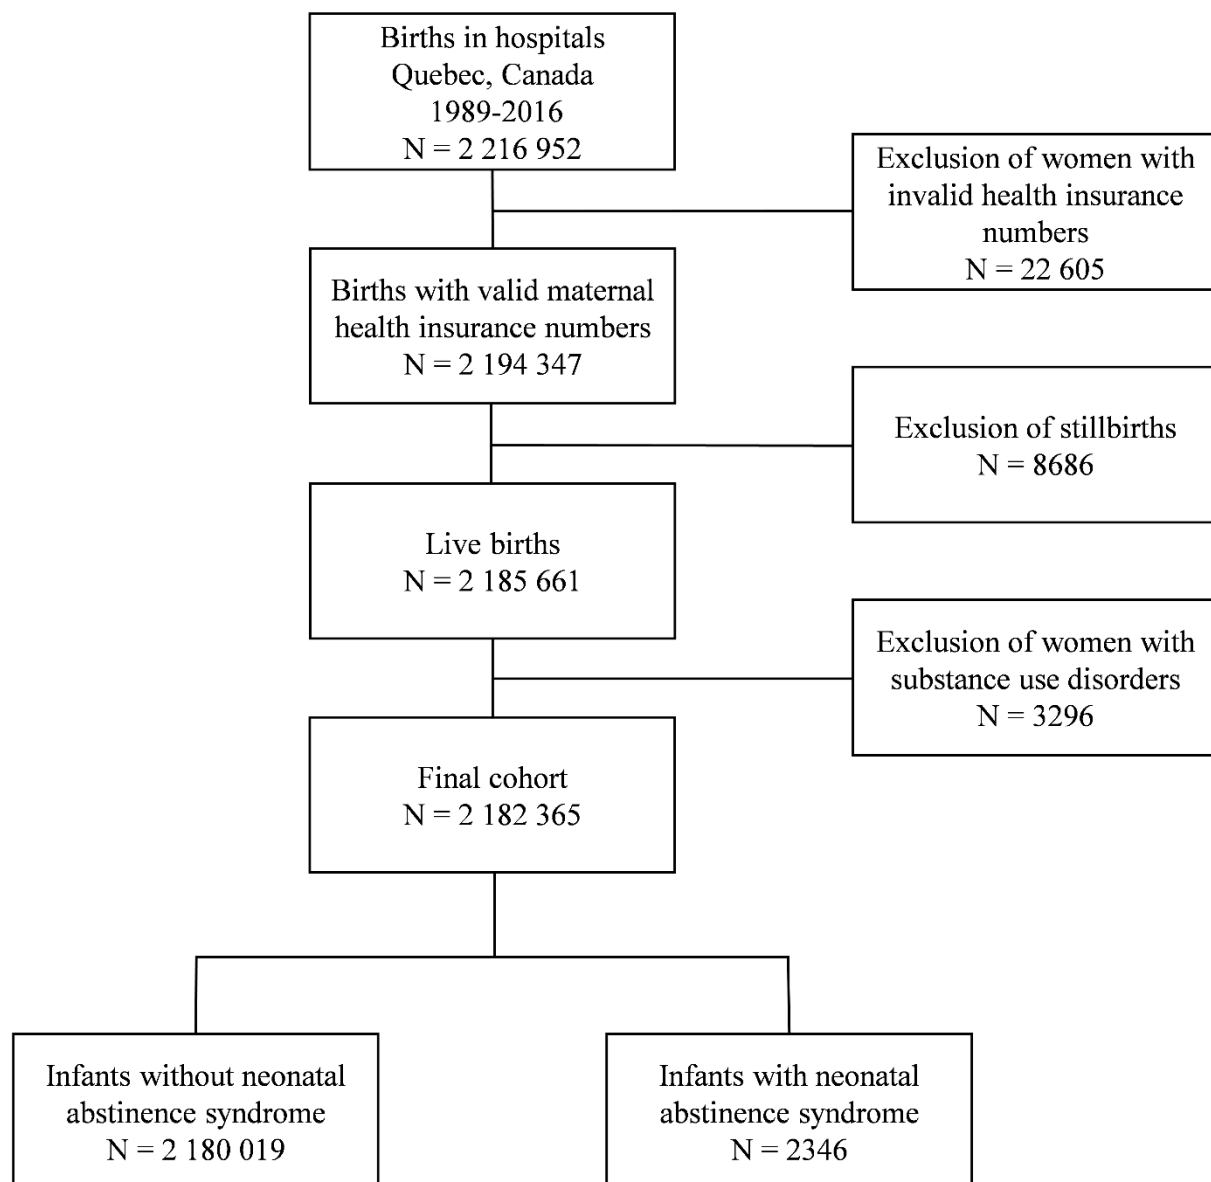

Supplement: 181519-res-1-at.pdf [file 181519-res-1-at.pdf]
